# Supplementary material for: Perioperative Schmerztherapie mit Nichtopioidanalgetika
Source: Springer Nature journal article supplement (doi:10.1007/s00104-021-01421-w), 2021-05-26
Supplement: MOESM1 [file 19199338]

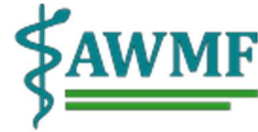

## Erklärung von Interessen

### Perioperative Schmerztherapie mit Nicht-Opioid-Analgetika Konsensbasierte Empfehlungen

zu Händen von Prof. Dr. Ulrike Stamer

#### Vorbemerkung

Alle Mitglieder der Leitliniengruppe sind gehalten, die nachstehende Erklärung von Interessen auszufüllen. Die Erklärung wird gegenüber dem Leitlinienkoordinator abgegeben. Dies soll bereits zu Beginn des Leitlinienprojekts erfolgen bzw. zu dem Zeitpunkt, an dem die Mitglieder ihre Teilnahme am Leitlinienprojekt gegenüber dem Koordinator bestätigen. Bei länger andauernden Projekten ist eine Erneuerung der Erklärung einmal pro Jahr bis zum Abschluss der Leitlinienentwicklung, zumindest aber vor der Konsensfindung, erforderlich.

In der Erklärung sind alle Interessen aufzuführen, unabhängig davon, ob der/die Erklärende selbst darin einen thematischen Bezug zur Leitlinie oder einen Interessenskonflikt sieht oder nicht. Ob Interessenkonflikte bestehen und ob dadurch die erforderliche Neutralität für die Mitarbeit bei der Leitlinienentwicklung in Frage gestellt ist oder in welchen speziellen Bereichen /Fragestellungen der Leitlinie das professionelle Urteilsvermögen eines Experten durch sekundäre Interessen beeinflusst sein könnte, ist durch einen Dritten zu bewerten und in der Leitliniengruppe zu diskutieren. Die Erklärung betrifft Interessen innerhalb **des laufenden Jahres sowie der zurückliegenden 3 Jahre**.

Die Originale der Erklärungen verbleiben vertraulich beim Leitlinienkoordinator. Die Inhalte der Erklärungen sind in der Langfassung der Leitlinie bzw. im Leitlinienreport in standardisierter Zusammenfassung offen darzulegen. Ergänzend sind das Verfahren der Sammlung und Bewertung der Erklärungen sowie die Ergebnisse der Diskussion zum Umgang mit Interessenkonflikten darzulegen.

#### Informationen zur Datenerhebung gemäß Artikel 13 DSGVO

Der Leitlinienkoordinator erhebt Ihre Daten zum Zweck des o.g. Leitlinienvorhabens sowie zur Erfüllung des Regelwerkes der AWMF. Die Datenerhebung und Datenverarbeitung sind für die Durchführung des Leitlinienvorhabens erforderlich und beruhen auf Artikel 6 Abs. 1 b) DSGVO. Eine Weitergabe der Daten an Dritte findet nur zum Zweck der Erfüllung des Regelwerkes der AWMF statt. Die Daten werden gelöscht, sobald sie für den Zweck ihrer Verarbeitung nicht mehr erforderlich sind. Sie sind berechtigt, Auskunft der im Rahmen des Leitlinienvorhabens über Sie gespeicherten Daten zu beantragen sowie bei Unrichtigkeit der Daten die Berichtigung oder bei unzulässiger Datenspeicherung die Löschung der Daten zu fordern.

## Erklärung

### 1. Allgemeine Angaben

|                                               |                                                                               |                                                                         |
|-----------------------------------------------|-------------------------------------------------------------------------------|-------------------------------------------------------------------------|
| Name, Vorname, Titel                          | Stamer, Ulrike; Prof. Dr. med-                                                |                                                                         |
| Arbeitgeber / Institution                     | Klinik für Anästhesiologie und Schmerztherapie, Inselspital, Universität Bern | Früher(e) innerhalb des laufenden Jahres oder der 3 Kalenderjahre davor |
| Position / Funktion in der Institution        | Oberärztin                                                                    |                                                                         |
| Adresse                                       | Freiburgstrasse, 3010 Bern                                                    |                                                                         |
| e-mail-Adresse                                | Ulrike.stamer@dbmr.unibe.ch                                                   |                                                                         |
| Bei Rückfragen telefonisch zu erreichen unter | +41-31-6329995                                                                |                                                                         |
| Funktion in der Leitliniengruppe              | Kordinatorin                                                                  |                                                                         |
| Datum                                         | 20.2.2020                                                                     |                                                                         |
| Zeitraum, auf den sich die Erklärung bezieht  | 2017-2020                                                                     |                                                                         |

## 2. Direkte, finanzielle Interessen

Hier werden finanzielle Beziehungen zu Unternehmen, Institutionen oder Interessenverbänden im Gesundheitswesen erfasst. Haben Sie oder die Einrichtung, für die Sie tätig sind, innerhalb des laufenden Jahres oder der 3 Kalenderjahre davor Zuwendungen erhalten von Unternehmen der Gesundheitswirtschaft (z.B. Arzneimittelindustrie, Medizinproduktindustrie), industriellen Interessenverbänden, kommerziell orientierten Auftragsinstituten, Versicherungen/Versicherungsträgern, oder von öffentlichen Geldgebern (z.B. Ministerien), Körperschaften/Einrichtungen der Selbstverwaltung, Stiftungen, oder anderen Geldgebern? Machen Sie bitte in folgender Tabelle zu allen zutreffenden Aspekten konkrete Angaben.

| Art der Beziehung/Tätigkeit                                   | Name des/der Kooperations-partner/s | Zeitraum der Beziehung/Tätigkeit <sup>1</sup> | Thema, Bezug zur Leitlinie <sup>2</sup>  | Art der Zuwendung <sup>3</sup>     | Höhe der Zuwendung <sup>4</sup> | Empfänger <sup>5</sup> |
|---------------------------------------------------------------|-------------------------------------|-----------------------------------------------|------------------------------------------|------------------------------------|---------------------------------|------------------------|
| Berater-/Gutachtertätigkeit                                   | Gemeinsamer Bundesausschuss, Berlin | 2017-2020                                     |                                          | Reisekosten, Aufwandsentschädigung |                                 | persönlich             |
| Mitarbeit in einem Wissenschaftlichen Beirat (advisory board) |                                     |                                               |                                          |                                    |                                 |                        |
| Vortrags-/oder Schulungstätigkeit                             | Grünenthal, Schweiz                 | 2/2018                                        | Projektvorstellung PAIN OUT / keine      | Aufwandsentschädigung              | 500 CHF                         | Institution            |
| Vortrags-/oder Schulungstätigkeit                             | Sanofi Aventis, Schweiz             | 9/2021                                        | Vortrag Agranulozytose+ Metamizol /keine | Reisekosten, Aufwandsentschädigung | 560 CHF                         | Institution            |
| Vortrags-/oder Schulungstätigkeit                             | Syntetica                           | 10/2017                                       | Vortrag Hydro-morphon / keine            | Reisekosten, Aufwandsentschädigung | 1000 CHF                        | Institution            |

<sup>1</sup> Innerhalb des Erfassungszeitraums, d.h. im gegenwärtigen und den zurückliegenden 3 Jahren, Angabe: von (Monat/Jahr) bis (Monat/Jahr)

<sup>2</sup> Angabe des Themas, bei Präparaten/Geräten auch Handelsname bzw. Wirkstoffname (Freitext), zusätzlich Angabe einer Selbsteinschätzung des Bezugs zur Leitlinie: „Nein“ oder „Ja“

<sup>3</sup> Honorar, Drittmittel, geldwerte Vorteile (z.B. Personal-oder Sachmittel; Reisekosten, Teilnahmegebühren, Bewirtung i.R. von Veranstaltungen), Verkaufslizenz

<sup>4</sup> Es können gerundete Beträge angegeben werden (z.B. bei Beiträgen > 1000 € jeweils auf die nächste Tausenderstelle): Die Angaben beziehen sich auf die Gesamtsumme der Zuwendungen für eine angegebene Tätigkeit über den Erfassungszeitraum, Angabe: von (Monat/Jahr) bis (Monat/Jahr).

Diese Angaben werden vertraulich behandelt.

<sup>5</sup> Bitte angeben: a) wenn Sie persönlich Empfänger der Zuwendung sind oder b) wenn es die Institution ist, für die Sie tätig sind und Sie innerhalb Ihrer Institution direkt entscheidungsverantwortlich für die Verwendung der Zuwendung/Mittel sind. Sind Sie nicht direkt entscheidungsverantwortlich, sind keine Angaben nötig.

|                                                                         |                                           |            |                                                         |                                                     |                                                            |             |
|-------------------------------------------------------------------------|-------------------------------------------|------------|---------------------------------------------------------|-----------------------------------------------------|------------------------------------------------------------|-------------|
| Vortrags-/oder Schulungstätigkeit                                       | Deutsche Schmerzgesellschaft, SGAR, DGAI, | jährlich   | Schmerztherapie                                         | Reisekosten, ggf. Hotel                             |                                                            | persönlich  |
| Autoren-/oder Coautorenschaft                                           | Siehe PubMed                              |            |                                                         |                                                     | keine                                                      |             |
| Forschungsvorhaben/<br>Durchführung klinischer Studien                  | PAIN OUT Universität Jena und EFIC        | 2018-2020  | Verbesserung postoperative Schmerztherapie / kein Bezug | -                                                   | 2 x Jahresgebühr PAIN OUT je 1500 € wurde von EFIC bezahlt | Institution |
| PROMPT IMI Pain Care EU und Pharma                                      | Uni Jena Schweizer Multizenterstudie, RCT | 2019-2021  | Verbesserung postoperative Analgesie                    | Aufwandsentschädigung für eingeschlossene Patienten | Keine                                                      | Institution |
| PREVENT                                                                 | PI B. Rehberg-Klug, Genf                  | läuft noch |                                                         |                                                     | keine                                                      |             |
| Eigentümerinteressen (Patent, Urheberrecht, Aktienbesitz <sup>6</sup> ) | keine                                     |            |                                                         |                                                     |                                                            |             |

### 3. Indirekte Interessen

Hier werden persönliche Beziehungen zu Interessenverbänden im Gesundheitswesen, „intellektuelle“, akademische, und wissenschaftliche Interessen oder Standpunkte sowie Schwerpunkte klinischer Tätigkeiten/Einkommensquellen erfasst (für den Zeitraum des laufenden Jahres oder der 3 Kalenderjahre davor). Hierunter fallen auch solche, die indirekt mit finanziellen persönlichen Interessen verbunden sein können.

- Sind oder waren Sie in Wissenschaftlichen Fachgesellschaften, Berufsverbänden, Institutionen der Selbstverwaltung, Patientenselbsthilfegruppen, Verbrauchervertretungen oder anderen Verbänden aktiv? Wenn ja, in welcher Funktion (z.B. Mandatsträger für diese/andere Leitlinien, Vorstand)?
- Können Sie Schwerpunkte Ihrer wissenschaftlichen und /oder klinischen Tätigkeiten benennen? Fühlen Sie sich bestimmten „Schulen“ zugehörig?
- Waren Sie an der inhaltlichen Gestaltung von Fortbildungen federführend beteiligt?
- Haben Sie persönliche Beziehungen (als Partner oder Verwandter 1. Grades) zu einem Vertretungsberechtigten eines Unternehmens der Gesundheitswirtschaft?

Machen Sie bitte in folgender Tabelle zu allen zutreffenden Aspekten konkrete Angaben.

<sup>6</sup>Betrifft nur Eigentümerinteressen im Gesundheitswesen; auch sind Angaben zu Mischfonds nicht erforderlich.

| Art der Beziehung/Tätigkeit                                                                                                                            | Namen / Schwerpunkte (bitte konkret benennen)                                                                                                                                                                                                                                                                                                                                                                                                                                                                                                                                                                                                                                                        | Zeitraum der Beziehung/<br>Tätigkeit <sup>7</sup>     | Themenbezug<br>zur Leitlinie <sup>8</sup> |
|--------------------------------------------------------------------------------------------------------------------------------------------------------|------------------------------------------------------------------------------------------------------------------------------------------------------------------------------------------------------------------------------------------------------------------------------------------------------------------------------------------------------------------------------------------------------------------------------------------------------------------------------------------------------------------------------------------------------------------------------------------------------------------------------------------------------------------------------------------------------|-------------------------------------------------------|-------------------------------------------|
| Mitgliedschaft /Funktion in<br>Interessenverbänden                                                                                                     | DGAI, Mitglied<br>Wissenschaftlicher AK Schmerzmedizin der DGAI: Mitglied<br>Wissenschaftlicher AK Geburtshilfliche Anästhesie der DGAI:<br>Mitglied<br>Deutsche Schmerzgesellschaft, 1. Sprecherin des AK Akutschmerz<br>der Deutschen Schmerzgesellschaft<br>Schweizer Anästhesiengesellschaft (SGAR);<br>Schweizer Akutschmerz AG in der SGAR<br>International Association for the Study of Pain (IASP), USA<br>Special Interest Group 'Acute Pain' of the IASP: Mitglied<br>European Society of Anaesthesiology and Intensive Care (ESAIC):<br>member<br>Sub-committee "Acute and Chronic Pain and Palliative Medicine" of<br>the ESAIC: chair person<br>European Pain Federation (EFIC); member | alles länger<br>als 10 Jahre<br>und noch<br>bestehend |                                           |
| Schwerpunkte wissenschaftlicher<br>Tätigkeiten, Publikationen                                                                                          | Postoperative Schmerztherapie, chronischer Schmerz nach<br>Operationen, CPSP, genetische Prädisposition Schmerz + PONV                                                                                                                                                                                                                                                                                                                                                                                                                                                                                                                                                                               |                                                       |                                           |
| Schwerpunkte klinischer Tätigkeiten                                                                                                                    | Schmerztherapie                                                                                                                                                                                                                                                                                                                                                                                                                                                                                                                                                                                                                                                                                      |                                                       |                                           |
| Federführende Beteiligung an<br>Fortbildungen/Ausbildungsinstituten                                                                                    | ESAIC Chairperson Subcommittee Acute and chronic pain and<br>palliative care<br>DGSS Sprecherin AK Akutschmerz<br>Seeheimer Akutschmerztag der Deutschen Schmerzgesellschaft.                                                                                                                                                                                                                                                                                                                                                                                                                                                                                                                        |                                                       |                                           |
| Persönliche Beziehungen (als Partner<br>oder Verwandter 1. Grades) zu einem<br>Vertretungsberechtigten eines<br>Unternehmens der Gesundheitswirtschaft | nein                                                                                                                                                                                                                                                                                                                                                                                                                                                                                                                                                                                                                                                                                                 |                                                       |                                           |

<sup>7</sup> Innerhalb des Erfassungszeitraums, d.h. im gegenwärtigen und den zurückliegenden 3 Jahren, Angabe: von (Monat/Jahr) bis (Monat/Jahr)

<sup>8</sup> Angabe einer Selbsteinschätzung „Nein“ oder „Ja“

#### 4. Sonstige Interessen

|                                                                                                                                                           |
|-----------------------------------------------------------------------------------------------------------------------------------------------------------|
| Sehen Sie andere Aspekte oder Umstände, die von Dritten als einschränkend in Bezug auf Ihre Objektivität oder Unabhängigkeit wahrgenommen werden könnten? |
| nein                                                                                                                                                      |

Ich erkläre hiermit nach bestem Wissen und Gewissen, dass ich alle mir derzeit bekannten Umstände aufgeführt habe, die gegebenenfalls zu einem persönlichen Interessenkonflikt bei der themenbezogenen Mitwirkung bei der Erstellung der Leitlinie führen können. Ich erkläre weiterhin, dass ich die Diskussion der Erklärungen anderer Mitglieder in der Leitliniengruppe absolut vertraulich behandeln werde. Ich bin darüber informiert, dass die Angaben in standardisierter Zusammenfassung mit der Leitlinie/in einem begleitenden Leitlinienreport veröffentlicht werden, und dass das vorliegende Formular vor der Einsicht unberechtigter Dritter geschützt aufbewahrt wird. Hiermit bin ich einverstanden.

20.2.2020

\_\_\_\_\_  
Datum

*Ulrike Stamer*

\_\_\_\_\_  
Unterschrift

#### Ergänzende Hinweise

- Bitte füllen Sie das Formular vollständig aus.
- Falls Sie zu bestimmten Fragen keine Angaben machen können oder wollen, begründen Sie dies bitte.
- Bitte speichern Sie das ausgefüllte Formular und senden es an [ulrike.stamer@dbmr.unibe.ch](mailto:ulrike.stamer@dbmr.unibe.ch)

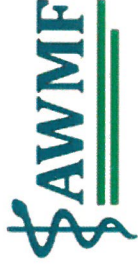

## Erklärung von Interessen

### Perioperative Schmerztherapie mit Nicht-Opioid-Analgetika Konsensbasierte Empfehlungen

zu Händen von Prof. Dr. Ulrike Stamer

#### Vorbemerkung

Alle Mitglieder der Leitliniengruppe sind gehalten, die nachstehende Erklärung von Interessen auszufüllen. Die Erklärung wird gegenüber dem Leitlinienkoordinator abgegeben. Dies soll bereits zu Beginn des Leitlinienprojekts erfolgen bzw. zu dem Zeitpunkt, an dem die Mitglieder ihre Teilnahme am Leitlinienprojekt gegenüber dem Koordinator bestätigen. Bei länger andauernden Projekten ist eine Erneuerung der Erklärung einmal pro Jahr bis zum Abschluss der Leitlinienentwicklung, zumindest aber vor der Konsensfindung, erforderlich.

In der Erklärung sind alle Interessen aufzuführen, unabhängig davon, ob der/die Erklärende selbst darin einen thematischen Bezug zur Leitlinie oder einen Interessenskonflikt sieht oder nicht. Ob Interessenkonflikte bestehen und ob dadurch die erforderliche Neutralität für die Mitarbeit bei der Leitlinienentwicklung in Frage gestellt ist oder in welchen speziellen Bereichen /Fragestellungen der Leitlinie das professionelle Urteilsvermögen eines Experten durch sekundäre Interessen beeinflusst sein könnte, ist durch einen Dritten zu bewerten und in der Leitliniengruppe zu diskutieren. Die Erklärung betrifft Interessen innerhalb **des laufenden Jahres sowie der zurückliegenden 3 Jahre**.

Die Originale der Erklärungen verbleiben vertraulich beim Leitlinienkoordinator. Die Inhalte der Erklärungen sind in der Langfassung der Leitlinie bzw. im Leitlinienreport in standardisierter Zusammenfassung offen darzulegen. Ergänzend sind das Verfahren der Sammlung und Bewertung der Erklärungen sowie die Ergebnisse der Diskussion zum Umgang mit Interessenkonflikten darzulegen.

#### Informationen zur Datenerhebung gemäß Artikel 13 DSGVO

Der Leitlinienkoordinator erhebt Ihre Daten zum Zweck des o.g. Leitlinienvorhabens sowie zur Erfüllung des Regelwerkes der AWMF. Die Datenerhebung und Datenverarbeitung sind für die Durchführung des Leitlinienvorhabens erforderlich und beruhen auf Artikel 6 Abs. 1 b) DSGVO. Eine Weitergabe der Daten an Dritte findet nur zum Zweck der Erfüllung des Regelwerkes der AWMF statt. Die Daten werden gelöscht, sobald sie für den Zweck ihrer Verarbeitung nicht mehr erforderlich sind. Sie sind berechtigt, Auskunft der im Rahmen des Leitlinienvorhabens über Sie gespeicherten Daten zu beantragen sowie bei Unrichtigkeit der Daten die Berichtigung oder bei unzulässiger Datenspeicherung die Löschung der Daten zu fordern.

## Erklärung

### 1. Allgemeine Angaben

|                                               |                                                                                                                                                                                                |                                                                                                                                      |
|-----------------------------------------------|------------------------------------------------------------------------------------------------------------------------------------------------------------------------------------------------|--------------------------------------------------------------------------------------------------------------------------------------|
| Name, Vorname, Titel                          | Erlenwein, Joachim, PD Dr. med.                                                                                                                                                                |                                                                                                                                      |
| Arbeitgeber / Institution                     | Gegenwärtig<br>Universitätsmedizin Göttingen, Klinik<br>für Anästhesiologie                                                                                                                    | Früher(e) innerhalb des laufenden<br>Jahres oder der 3 Kalenderjahre<br>davor<br>kein anderer Arbeitgeber in den<br>letzten 3 Jahren |
| Position / Funktion in der Institution        | Oberarzt der Klinik für Anästhesiologie<br>(Schmerzmedizin - Schmerztagesklinik<br>und Ambulanz und bereichsleitender<br>Oberarzt für den innerklinischen<br>Schmerzdienst)                    |                                                                                                                                      |
| Adresse                                       | Robert-Koch-Str. 40, 37075 Göttingen                                                                                                                                                           |                                                                                                                                      |
| e-mail-Adresse                                | joachim.erlenwein@med.uni-goettingen.de                                                                                                                                                        |                                                                                                                                      |
| Bei Rückfragen telefonisch zu erreichen unter | 0551-39-12206                                                                                                                                                                                  |                                                                                                                                      |
| Funktion in der Leitliniengruppe              | Co-Autor, Vertreter WAK Schmerzmedizin, Deutsche Gesellschaft für<br>Anästhesiologie und Intensivmedizin e.V. (DGAI, Nürnberg); Vertreter AK<br>Akutschmerz, Deutsche Schmerzgesellschaft e.V. |                                                                                                                                      |
| Datum                                         | 25.06.2020                                                                                                                                                                                     |                                                                                                                                      |
| Zeitraum, auf den sich die Erklärung bezieht  | jetzt, bezogen auf die vergangenen 3 Jahre                                                                                                                                                     |                                                                                                                                      |



## 2. Direkte, finanzielle Interessen

Hier werden finanzielle Beziehungen zu Unternehmen, Institutionen oder Interessenverbänden im Gesundheitswesen erfasst. Haben Sie oder die Einrichtung, für die Sie tätig sind, innerhalb des laufenden Jahres oder der 3 Kalenderjahre davor Zuwendungen erhalten von Unternehmen der Gesundheitswirtschaft (z.B. Arzneimittelindustrie, Medizinproduktindustrie), industriellen Interessenverbänden, kommerziell orientierten Auftragsinstituten, Versicherungen/Versicherungsträgern, oder von öffentlichen Geldgebern (z.B. Ministerien), Körperschaften/Einrichtungen der Selbstverwaltung, Stiftungen, oder anderen Geldgebern? Machen Sie bitte in folgender Tabelle zu allen zutreffenden Aspekten konkrete Angaben.

| Art der Beziehung/Tätigkeit                                   | Name des/der Kooperationspartner/s                | Zeitraum der Beziehung/Tätigkeit <sup>1</sup> | Thema, Bezug zur Leitlinie <sup>2</sup> | Art der Zuwendung <sup>3</sup>      | Höhe der Zuwendung <sup>4</sup>                                    | Empfänger <sup>5</sup>                         |
|---------------------------------------------------------------|---------------------------------------------------|-----------------------------------------------|-----------------------------------------|-------------------------------------|--------------------------------------------------------------------|------------------------------------------------|
| Berater-/Gutachtertätigkeit                                   | -                                                 | -                                             | -                                       | -                                   | -                                                                  |                                                |
| Mitarbeit in einem Wissenschaftlichen Beirat (advisory board) | -                                                 | -                                             | -                                       | -                                   | -                                                                  |                                                |
| Vortrags-/oder Schulungstätigkeit                             | -                                                 | -                                             | -                                       | -                                   | -                                                                  |                                                |
| Autoren-/oder Coautorenschaft                                 | -                                                 | -                                             | -                                       | -                                   | -                                                                  |                                                |
| Forschungsvorhaben/<br>Durchführung klinischer Studien        | 2019 bewilligter Antrag „POET PAIN“ der Deutschen | Mitarbeit an dem Projekt seit 2018            | keine direkte                           | finanzielle Forschungsunterstützung | noch nicht exakt feststehen (Bescheid nach DLR Prüfung ausstehend) | Universitätsmedizin Göttingen als Konsortialpa |

<sup>1</sup> Innerhalb des Erfassungszeitraums, d.h. im gegenwärtigen und den zurückliegenden 3 Jahren, Angabe: von (Monat/Jahr) bis (Monat/Jahr)

<sup>2</sup> Angabe des Themas, bei Präparaten/Geräten auch Handelsname bzw. Wirkstoffname (Freitext), zusätzlich Angabe einer Selbsteinschätzung des Bezugs zur Leitlinie: „Nein“ oder „Ja“

<sup>3</sup> Honorar, Drittmittel, geldwerte Vorteile (z.B. Personal- oder Sachmittel; Reisekosten, Teilnahmegebühren, Bewirtung i.R. von Veranstaltungen), Verkaufslizenz

<sup>4</sup> Es können gerundete Beträge angegeben werden (z.B. bei Beiträgen > 1000 € jeweils auf die nächste Tausenderstelle): Die Angaben beziehen sich auf die Gesamtsumme der Zuwendungen für eine angegebene Tätigkeit über den Erfassungszeitraum, Angabe: von (Monat/Jahr) bis (Monat/Jahr).

Diese Angaben werden vertraulich behandelt.

<sup>5</sup> Bitte angeben: a) wenn Sie persönlich Empfänger der Zuwendung sind oder b) wenn es die Institution ist, für die Sie tätig sind und Sie innerhalb Ihrer Institution direkt entscheidungsverantwortlich für die Verwendung der Zuwendung/Mittel sind. Sind Sie nicht direkt entscheidungsverantwortlich, sind keine Angaben nötig.

|                                                                         |                                                                           |   |   |   |  |                                       |
|-------------------------------------------------------------------------|---------------------------------------------------------------------------|---|---|---|--|---------------------------------------|
|                                                                         | Schmerzgesellschaft beim Innovationsfonds des Gemeinsamen Bundesausschuss |   |   |   |  | Partner, vertreten durch J. Erlenwein |
| Eigentümerinteressen (Patent, Urheberrecht, Aktienbesitz <sup>6</sup> ) | -                                                                         | - | - | - |  |                                       |

<sup>6</sup> Betrifft nur Eigentümerinteressen im Gesundheitswesen; auch sind Angaben zu Mischfonds nicht erforderlich.

### 3. Indirekte Interessen

Hier werden persönliche Beziehungen zu Interessenverbänden im Gesundheitswesen, „intellektuelle“, akademische, und wissenschaftliche Interessen oder Standpunkte sowie Schwerpunkte klinischer Tätigkeiten/Einkommensquellen erfasst (für den Zeitraum des laufenden Jahres oder der 3 Kalenderjahre davor). Hierunter fallen auch solche, die indirekt mit finanziellen persönlichen Interessen verbunden sein können.

- Sind oder waren Sie in Wissenschaftlichen Fachgesellschaften, Berufsverbänden, Institutionen der Selbstverwaltung, Patientenselbsthilfegruppen, Verbrauchervertretungen oder anderen Verbänden aktiv? Wenn ja, in welcher Funktion (z.B. Mandatsträger für diese/andere Leitlinien, Vorstand)?
- Können Sie Schwerpunkte Ihrer wissenschaftlichen und /oder klinischen Tätigkeiten benennen? Fühlen Sie sich bestimmten „Schulen“ zugehörig?
- Waren Sie an der inhaltlichen Gestaltung von Fortbildungen federführend beteiligt?
- Haben Sie persönliche Beziehungen (als Partner oder Verwandter 1. Grades) zu einem Vertretungsberechtigten eines Unternehmens der Gesundheitswirtschaft?

Machen Sie bitte in folgender Tabelle zu allen zutreffenden Aspekten konkrete Angaben.

| Art der Beziehung/Tätigkeit                     | Namen / Schwerpunkte (bitte konkret benennen)                                                                                                                                                                                                                                                                                                                                                                                                                                                                                                                                                                                                                                                                                                                                                                                                                                                                   | Zeitraum der Beziehung/Tätigkeit <sup>7</sup> | Themenbezug zur Leitlinie <sup>8</sup>                              |
|-------------------------------------------------|-----------------------------------------------------------------------------------------------------------------------------------------------------------------------------------------------------------------------------------------------------------------------------------------------------------------------------------------------------------------------------------------------------------------------------------------------------------------------------------------------------------------------------------------------------------------------------------------------------------------------------------------------------------------------------------------------------------------------------------------------------------------------------------------------------------------------------------------------------------------------------------------------------------------|-----------------------------------------------|---------------------------------------------------------------------|
| Mitgliedschaft /Funktion in Interessenverbänden | <p>Deutsche Gesellschaft für Anästhesiologie und Intensivmedizin e.V. (DGAI, Nürnberg)</p> <ul style="list-style-type: none"> <li>• Sprecher des Wissenschaftlichen Arbeitskreis Schmerzmedizin, 01/20 bis heute</li> <li>• Standortvertreter Göttingen des Wiss. Arbeitskreis Wissenschaftlicher Nachwuchs, 2019 bis heute</li> </ul> <p>Deutsche Schmerzgesellschaft e.V. (Berlin)</p> <ul style="list-style-type: none"> <li>• 2. Sprecher des Arbeitskreises Akutschmerz, 01/2016</li> <li>• Mitglied der wiss. Programmkommission Deutscher Schmerzkongress (2018/2019/2020)</li> <li>• Mitglied Ad-hoc-Kommission „Kongressfortbildung beim Deutschen Schmerzkongress“, 2017 bis heute</li> <li>• Mitglied der Ad-hoc-Kommission „Zertifizierung“</li> <li>• Wiss. Leitung „Seeheimer Akutschmerzstage“, 2016 bis heute</li> <li>• Wiss. Leitung (komm.) „Akutschmerzkurse“, 01/2020 bis heute</li> </ul> | siehe Spalte 1.                               | kein direkter Bezug, Vertreter von 2 beteiligten Fachgesellschaften |

<sup>7</sup> Innerhalb des Erfassungszeitraums, d.h. im gegenwärtigen und den zurückliegenden 3 Jahren, Angabe: von (Monat/Jahr) bis (Monat/Jahr)

<sup>8</sup> Angabe einer Selbsteinschätzung „Nein“ oder „Ja“

|                                                                                                                                               |                                                                                                                                                                                                                                                                                                                                                                                                                          |                 |                                                                     |
|-----------------------------------------------------------------------------------------------------------------------------------------------|--------------------------------------------------------------------------------------------------------------------------------------------------------------------------------------------------------------------------------------------------------------------------------------------------------------------------------------------------------------------------------------------------------------------------|-----------------|---------------------------------------------------------------------|
|                                                                                                                                               | <p>Mitgliedschaften ohne aktive Funktion:</p> <p>Deutsche Migräne und Kopfschmerzgesellschaft e.V. (Königstein im Taunus)</p> <p>Sertürner Gesellschaft e.V. (Einbeck)</p> <p>Göttinger Schmerz- und Palliativverein e.V. (Göttingen)</p> <p>European Society of Anaesthesiology (Assoziierte Mitgliedschaft; Brüssel, Belgien)</p> <p>International Association for the Study of Pain (IASP, Washington, D.C., USA)</p> |                 |                                                                     |
| Schwerpunkte wissenschaftlicher Tätigkeiten, Publikationen                                                                                    | Schmerzchronifizierung und chronischer Schmerz als Komorbidität; Rücken- und Nackenschmerz; Schmerzmedizinische Versorgungsforschung                                                                                                                                                                                                                                                                                     |                 |                                                                     |
| Schwerpunkte klinischer Tätigkeiten                                                                                                           | Schmerzambulanz, Schmerztagesklinik, Innerklinischer Schmerzdienst                                                                                                                                                                                                                                                                                                                                                       |                 |                                                                     |
| Federführende Beteiligung an Fortbildungen/Ausbildungsinstituten                                                                              | siehe oben bei Fachgesellschaften                                                                                                                                                                                                                                                                                                                                                                                        | siehe 1. Spalte | kein direkter Bezug, Vertreter von 2 beteiligten Fachgesellschaften |
| Persönliche Beziehungen (als Partner oder Verwandter 1. Grades) zu einem Vertretungsberechtigten eines Unternehmens der Gesundheitswirtschaft | keine                                                                                                                                                                                                                                                                                                                                                                                                                    | -               | -                                                                   |

**4. Sonstige Interessen**

|                                                                                                                                                           |
|-----------------------------------------------------------------------------------------------------------------------------------------------------------|
| Sehen Sie andere Aspekte oder Umstände, die von Dritten als einschränkend in Bezug auf Ihre Objektivität oder Unabhängigkeit wahrgenommen werden könnten? |
| nein                                                                                                                                                      |

Ich erkläre hiermit nach bestem Wissen und Gewissen, dass ich alle mir derzeit bekannten Umstände aufgeführt habe, die gegebenenfalls zu einem persönlichen Interessenkonflikt bei der themenbezogenen Mitwirkung bei der Erstellung der Leitlinie führen können. Ich erkläre weiterhin, dass ich die Diskussion der Erklärungen anderer Mitglieder in der Leitliniengruppe absolut vertraulich behandeln werde. Ich bin darüber informiert, dass die Angaben in standardisierter Zusammenfassung mit der Leitlinie/in einem begleitenden Leitlinienreport veröffentlicht werden, und dass das vorliegende Formular vor der Einsicht unberechtigter Dritter geschützt aufbewahrt wird. Hiermit bin ich einverstanden.

25.6.2020

Datum

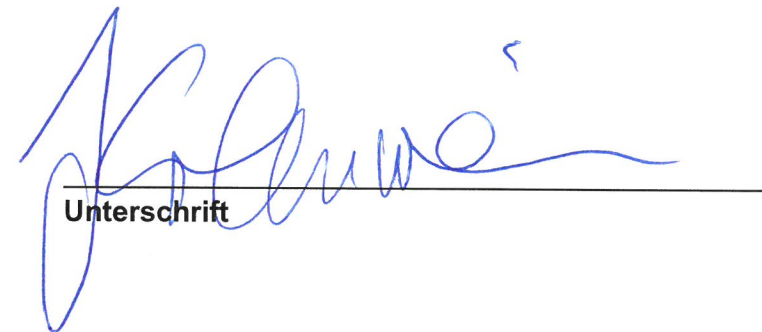

Unterschrift

**Ergänzende Hinweise**

- Bitte füllen Sie das Formular vollständig aus.
- Falls Sie zu bestimmten Fragen keine Angaben machen können oder wollen, begründen Sie dies bitte.
- Bitte speichern Sie das ausgefüllte Formular und senden es an [ulrike.stamer@dbmr.unibe.ch](mailto:ulrike.stamer@dbmr.unibe.ch)

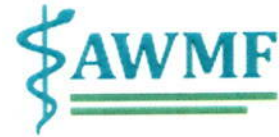

## Erklärung von Interessen

(Titel) AWMF-Registernummer

zu Händen

Leitlinienkoordinator

### Vorbemerkung

Alle Mitglieder der Leitliniengruppe sind gehalten, die nachstehende Erklärung von Interessen auszufüllen. Die Erklärung wird gegenüber dem Leitlinienkoordinator abgegeben. Dies soll bereits zu Beginn des Leitlinienprojekts erfolgen bzw. zu dem Zeitpunkt, an dem die Mitglieder ihre Teilnahme am Leitlinienprojekt gegenüber dem Koordinator bestätigen. Bei länger andauernden Projekten ist eine Erneuerung der Erklärung einmal pro Jahr bis zum Abschluss der Leitlinienentwicklung, zumindest aber vor der Konsensfindung, erforderlich.

In der Erklärung sind alle Interessen aufzuführen, unabhängig davon, ob der/die Erklärende selbst darin einen thematischen Bezug zur Leitlinie oder einen Interessenskonflikt sieht oder nicht. Ob Interessenkonflikte bestehen und ob dadurch die erforderliche Neutralität für die Mitarbeit bei der Leitlinienentwicklung in Frage gestellt ist oder in welchen speziellen Bereichen /Fragestellungen der Leitlinie das professionelle Urteilsvermögen eines Experten durch sekundäre Interessen beeinflusst sein könnte, ist durch einen Dritten zu bewerten und in der Leitliniengruppe zu diskutieren. Die Erklärung betrifft Interessen innerhalb **des laufenden Jahres sowie der zurückliegenden 3 Jahre**.

Die Originale der Erklärungen verbleiben vertraulich beim Leitlinienkoordinator. Die Inhalte der Erklärungen sind in der Langfassung der Leitlinie bzw. im Leitlinienreport in standardisierter Zusammenfassung offen darzulegen. Ergänzend sind das Verfahren der Sammlung und Bewertung der Erklärungen sowie die Ergebnisse der Diskussion zum Umgang mit Interessenkonflikten darzulegen.

### Informationen zur Datenerhebung gemäß Artikel 13 DSGVO

Der Leitlinienkoordinator erhebt Ihre Daten zum Zweck des o.g. Leitlinienvorhabens sowie zur Erfüllung des Regelwerkes der AWMF. Die Datenerhebung und Datenverarbeitung sind für die Durchführung des Leitlinienvorhabens erforderlich und beruhen auf Artikel 6 Abs. 1 b) DSGVO. Eine Weitergabe der Daten an Dritte findet nur zum Zweck der Erfüllung des Regelwerkes der AWMF statt. Die Daten werden gelöscht, sobald sie für den Zweck ihrer Verarbeitung nicht mehr erforderlich sind. Sie sind berechtigt, Auskunft der im Rahmen des Leitlinienvorhabens über Sie gespeicherten Daten zu beantragen sowie bei Unrichtigkeit der Daten die Berichtigung oder bei unzulässiger Datenspeicherung die Löschung der Daten zu fordern.

## Erklärung

### 1. Allgemeine Angaben

|                                               |                                                                            |                                                                               |
|-----------------------------------------------|----------------------------------------------------------------------------|-------------------------------------------------------------------------------|
| Name, Vorname, Titel                          | Freys, Stephan M., Prof.Dr.med.                                            |                                                                               |
| Arbeitgeber / Institution                     | Gegenwärtig<br>DIAKO Ev. Diakonie-Krankenhaus<br>gemeinnützige Gmbh Bremen | Früher(e) innerhalb des laufenden<br>Jahres oder der 3 Kalenderjahre<br>davor |
| Position / Funktion in der Institution        | Chefarzt Chirurgische Klinik                                               |                                                                               |
| Adresse                                       | Gröpelinger Heerstr. 406-408, 28239 Bremen                                 |                                                                               |
| e-mail-Adresse                                | <a href="mailto:chirurgie@diako-bremen.de">chirurgie@diako-bremen.de</a>   |                                                                               |
| Bei Rückfragen telefonisch zu erreichen unter | 0421 / 6102 1101                                                           |                                                                               |
| Funktion in der Leitliniengruppe              | Mitglied, Mandatsträger DGCH                                               |                                                                               |
| Datum                                         | 27.02.2020                                                                 |                                                                               |
| Zeitraum, auf den sich die Erklärung bezieht  | 2017 bis heute                                                             |                                                                               |

## 2. Direkte, finanzielle Interessen

Hier werden finanzielle Beziehungen zu Unternehmen, Institutionen oder Interessenverbänden im Gesundheitswesen erfasst. Haben Sie oder die Einrichtung, für die Sie tätig sind, innerhalb des laufenden Jahres oder der 3 Kalenderjahre davor Zuwendungen erhalten von Unternehmen der Gesundheitswirtschaft (z.B. Arzneimittelindustrie, Medizinproduktindustrie), industriellen Interessenverbänden, kommerziell orientierten Auftragsinstituten, Versicherungen/Versicherungsträgern, oder von öffentlichen Geldgebern (z.B. Ministerien), Körperschaften/Einrichtungen der Selbstverwaltung, Stiftungen, oder anderen Geldgebern? Machen Sie bitte in folgender Tabelle zu allen zutreffenden Aspekten konkrete Angaben.

| Art der Beziehung/Tätigkeit                                             | Name des/der Kooperationspartner/s | Zeitraum der Beziehung/Tätigkeit <sup>1</sup> | Thema, Bezug zur Leitlinie <sup>2</sup> | Art der Zuwendung <sup>3</sup> | Höhe der Zuwendung <sup>4</sup> | Empfänger <sup>5</sup>                      |
|-------------------------------------------------------------------------|------------------------------------|-----------------------------------------------|-----------------------------------------|--------------------------------|---------------------------------|---------------------------------------------|
| Berater-/Gutachtertätigkeit                                             |                                    |                                               |                                         |                                |                                 |                                             |
| Mitarbeit in einem wissenschaftlichen Beirat (advisory board)           | Grünenthal GmbH                    | 2017 - heute                                  | Orale PCA mit Sufentanil (Zalviso®)     | Honorar                        | 7.400,-                         | DIAKO Ev. Diakonie-Krankenhaus gGmbH Bremen |
| Vortrags-/oder Schulungstätigkeit                                       |                                    |                                               |                                         |                                |                                 |                                             |
| Autoren-/oder Coautorenschaft                                           |                                    |                                               |                                         |                                |                                 |                                             |
| Forschungsvorhaben/<br>Durchführung klinischer Studien                  |                                    |                                               |                                         |                                |                                 |                                             |
| Eigentümerinteressen (Patent, Urheberrecht, Aktienbesitz <sup>6</sup> ) |                                    |                                               |                                         |                                |                                 |                                             |

<sup>1</sup> Innerhalb des Erfassungszeitraums, d.h. im gegenwärtigen und den zurückliegenden 3 Jahren, Angabe: von (Monat/Jahr) bis (Monat/Jahr)

<sup>2</sup> Angabe des Themas, bei Präparaten/Geräten auch Handelsname bzw. Wirkstoffname (Freitext); zusätzlich Angabe einer Selbsteinschätzung des Bezugs zur Leitlinie: „Nein“ oder „Ja“

<sup>3</sup> Honorar, Drittmittel, geldwerte Vorteile (z.B. Personal- oder Sachmittel; Reisekosten, Teilnahmegebühren, Bewirtung i.R. von Veranstaltungen), Verkaufslizenz  
<sup>4</sup> Es können gerundete Beträge angegeben werden (z.B. bei Beiträgen > 1000 € jeweils auf die nächste Tausenderstelle); Die Angaben beziehen sich auf die Gesamtsumme der Zuwendungen für eine angegebene Tätigkeit über den Erfassungszeitraum, Angabe: von (Monat/Jahr) bis (Monat/Jahr).  
 Diese Angaben werden vertraulich behandelt.

<sup>5</sup> Bitte angeben: a) wenn Sie persönlich Empfänger der Zuwendung sind oder b) wenn es die Institution ist, für die Sie tätig sind und Sie innerhalb Ihrer Institution direkt entscheidungsverantwortlich für die Verwendung der Zuwendung/Mittel sind. Sind Sie nicht direkt entscheidungsverantwortlich, sind keine Angaben nötig.

<sup>6</sup> Betrifft nur Eigentümerinteressen im Gesundheitswesen; auch sind Angaben zu Mischfonds nicht erforderlich.



### 3. Indirekte Interessen

Hier werden persönliche Beziehungen zu Interessenverbänden im Gesundheitswesen, „intellektuelle“, akademische, und wissenschaftliche Interessen oder Standpunkte sowie Schwerpunkte klinischer Tätigkeiten/Einkommensquellen erfasst (für den Zeitraum des laufenden Jahres oder der 3 Kalenderjahre davor). Hierunter fallen auch solche, die indirekt mit finanziellen persönlichen Interessen verbunden sein können.

- Sind oder waren Sie in Wissenschaftlichen Fachgesellschaften, Berufsverbänden, Institutionen der Selbstverwaltung, Patientenselbsthilfegruppen, Verbraucherververtretungen oder anderen Verbänden aktiv? Wenn ja, in welcher Funktion (z. B. Mandatsträger für diese/andere Leitlinien, Vorstand)?
- Können Sie Schwerpunkte Ihrer wissenschaftlichen und/oder klinischen Tätigkeiten benennen? Fühlen Sie sich bestimmten „Schulen“ zugehörig?
- Waren Sie an der inhaltlichen Gestaltung von Fortbildungen federführend beteiligt?
- Haben Sie persönliche Beziehungen (als Partner oder Verwandter 1. Grades) zu einem Vertretungsberechtigten eines Unternehmens der Gesundheitswirtschaft?

Machen Sie bitte in folgender Tabelle zu allen zutreffenden Aspekten konkrete Angaben.

| Art der Beziehung/Tätigkeit                                                                                                                            | Namen / Schwerpunkte (bitte konkret benennen)                                                                                                                                                                                                                                                                                                                    | Zeitraum der Beziehung/<br>Tätigkeit <sup>7</sup>             | Themenbezug<br>zur Leitlinie <sup>8</sup> |
|--------------------------------------------------------------------------------------------------------------------------------------------------------|------------------------------------------------------------------------------------------------------------------------------------------------------------------------------------------------------------------------------------------------------------------------------------------------------------------------------------------------------------------|---------------------------------------------------------------|-------------------------------------------|
| Mitgliedschaft /Funktion in<br>Interessenverbänden                                                                                                     | Vorstandsmitglied Bremer Krebsgesellschaft<br>Vorstandsmitglied Arbeitsgemeinschaft Deutscher Darmkrebszentren (addz)<br>Vorstandsmitglied Vereinigung Norddeutscher Chirurgen (NDCH)<br>Vorsitzender Verband Leitender Krankenhausärzte (VLK Bremen)<br>Vorsitzender Chirurgische Arbeitsgemeinschaft (CAAS) der<br>Deutschen Gesellschaft für Chirurgie (DGCH) | Seit 2014<br>Seit 2011<br>Seit 2013<br>Seit 2018<br>Seit 2013 | Kein<br>Kein<br>Kein<br>Kein<br>Kein      |
| Schwerpunkte wissenschaftlicher<br>Tätigkeiten, Publikationen                                                                                          |                                                                                                                                                                                                                                                                                                                                                                  |                                                               |                                           |
| Schwerpunkte klinischer Tätigkeiten                                                                                                                    |                                                                                                                                                                                                                                                                                                                                                                  |                                                               |                                           |
| Federführende Beteiligung an<br>Fortbildungen/Ausbildungsinstituten                                                                                    |                                                                                                                                                                                                                                                                                                                                                                  |                                                               |                                           |
| Persönliche Beziehungen (als Partner<br>oder Verwandter 1. Grades) zu einem<br>Vertretungsberechtigten eines<br>Unternehmens der Gesundheitswirtschaft |                                                                                                                                                                                                                                                                                                                                                                  |                                                               |                                           |

<sup>7</sup> Innerhalb des Erfassungszeitraums, d.h. im gegenwärtigen und den zurückliegenden 3 Jahren, Angabe: von (Monat/Jahr) bis (Monat/Jahr)

<sup>8</sup> Angabe einer Selbsteinschätzung „Nein“ oder „Ja“

#### 4. Sonstige Interessen

|                                                                                                                                                           |
|-----------------------------------------------------------------------------------------------------------------------------------------------------------|
| Sehen Sie andere Aspekte oder Umstände, die von Dritten als einschränkend in Bezug auf Ihre Objektivität oder Unabhängigkeit wahrgenommen werden könnten? |
| nein                                                                                                                                                      |

Ich erkläre hiermit nach bestem Wissen und Gewissen, dass ich alle mir derzeit bekannten Umstände aufgeführt habe, die gegebenenfalls zu einem persönlichen Interessenkonflikt bei der themenbezogenen Mitwirkung bei der Erstellung der Leitlinie führen können. Ich erkläre weiterhin, dass ich die Diskussion der Erklärungen anderer Mitglieder in der Leitliniengruppe absolut vertraulich behandeln werde. Ich bin darüber informiert, dass die Angaben in standardisierter Zusammenfassung mit der Leitlinie/in einem begleitenden Leitlinienreport veröffentlicht werden, und dass das vorliegende Formular vor der Einsicht unberechtigter Dritter geschützt aufbewahrt wird. Hiermit bin ich einverstanden.

27.02.2020

Datum

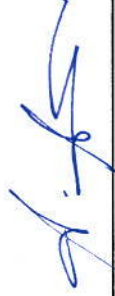

Unterschrift

#### Ergänzende Hinweise

- Bitte füllen Sie das Formular vollständig aus.
- Falls Sie zu bestimmten Fragen keine Angaben machen können oder wollen, begründen Sie dies bitte.
- Bitte speichern Sie das ausgefüllte Formular und senden es an das Leitliniensekretariat: [xxx@yyy.zz](mailto:xxx@yyy.zz)

## Erklärung

### 1. Allgemeine Angaben

|                                               |                                                                                |                                                                                               |
|-----------------------------------------------|--------------------------------------------------------------------------------|-----------------------------------------------------------------------------------------------|
| Name, Vorname, Titel                          | Stammschulte, Thomas, Dr. med.                                                 |                                                                                               |
| Arbeitgeber / Institution                     | Gegenwärtig<br>Arzneimittelkommission der deutschen Ärzteschaft (AkdÄ)         | Früher(e) innerhalb des laufenden Jahres oder der 3 Kalenderjahre davor<br><br>Ebenfalls AkdÄ |
| Position / Funktion in der Institution        | Referent Pharmakovigilanz                                                      |                                                                                               |
| Adresse                                       | Herbert-Lewin-Platz 1, 10629 Berlin                                            |                                                                                               |
| e-mail-Adresse                                | <a href="mailto:thomas.stammschulte@akdae.de">thomas.stammschulte@akdae.de</a> |                                                                                               |
| Bei Rückfragen telefonisch zu erreichen unter | 030 400445561                                                                  |                                                                                               |
| Funktion in der Leitliniengruppe              | Coautor                                                                        |                                                                                               |
| Datum                                         | 9.6.2020                                                                       |                                                                                               |
| Zeitraum, auf den sich die Erklärung bezieht  | 2017 bis 2020                                                                  |                                                                                               |

## 2. Direkte, finanzielle Interessen

Hier werden finanzielle Beziehungen zu Unternehmen, Institutionen oder Interessenverbänden im Gesundheitswesen erfasst. Haben Sie oder die Einrichtung, für die Sie tätig sind, innerhalb des laufenden Jahres oder der 3 Kalenderjahre davor Zuwendungen erhalten von Unternehmen der Gesundheitswirtschaft (z.B. Arzneimittelindustrie, Medizinproduktindustrie), industriellen Interessenverbänden, kommerziell orientierten Auftragsinstituten, Versicherungen/Versicherungsträgern, oder von öffentlichen Geldgebern (z.B. Ministerien), Körperschaften/Einrichtungen der Selbstverwaltung, Stiftungen, oder anderen Geldgebern? Machen Sie bitte in folgender Tabelle zu allen zutreffenden Aspekten konkrete Angaben.

| Art der Beziehung/Tätigkeit                                   | Name des/der Kooperationspartner/s                                         | Zeitraum der Beziehung/Tätigkeit <sup>1</sup> | Thema, Bezug zur Leitlinie <sup>2</sup> | Art der Zuwendung <sup>3</sup> | Höhe der Zuwendung <sup>4</sup>       | Empfänger <sup>5</sup> |
|---------------------------------------------------------------|----------------------------------------------------------------------------|-----------------------------------------------|-----------------------------------------|--------------------------------|---------------------------------------|------------------------|
| Berater-/Gutachtertätigkeit                                   |                                                                            |                                               |                                         |                                |                                       |                        |
| Mitarbeit in einem Wissenschaftlichen Beirat (advisory board) |                                                                            |                                               |                                         |                                |                                       |                        |
| Vortrags-/oder Schulungstätigkeit                             | Vorträge auf Fortbildungsveranstaltungen verschiedener Landessärztekammern |                                               |                                         |                                | ca. 2000 Euro in den letzten 3 Jahren |                        |
| Autoren-/oder Coautorenschaft                                 |                                                                            |                                               |                                         |                                |                                       |                        |
| Forschungsvorhaben/<br>Durchführung klinischer Studien        |                                                                            |                                               |                                         |                                |                                       |                        |

<sup>1</sup> Innerhalb des Erfassungszeitraums, d.h. im gegenwärtigen und den zurückliegenden 3 Jahren, Angabe: von (Monat/Jahr) bis (Monat/Jahr)

<sup>2</sup> Angabe des Themas, bei Präparaten/Geräten auch Handelsname bzw. Wirkstoffname (Freitext), zusätzlich Angabe einer Selbsteinschätzung des Bezugs zur Leitlinie: „Nein“ oder „Ja“

<sup>3</sup> Honorar, Drittmittel, geldwerte Vorteile (z.B. Personal-oder Sachmittel; Reisekosten, Teilnahmegebühren, Bewirtung i.R. von Veranstaltungen), Verkaufslizenz

<sup>4</sup> Es können gerundete Beträge angegeben werden (z.B. bei Beiträgen > 1000 € jeweils auf die nächste Tausenderstelle): Die Angaben beziehen sich auf die Gesamtsumme der Zuwendungen für eine angegebene Tätigkeit über den Erfassungszeitraum, Angabe: von (Monat/Jahr) bis (Monat/Jahr).

Diese Angaben werden vertraulich behandelt.

<sup>5</sup> Bitte angeben: a) wenn Sie persönlich Empfänger der Zuwendung sind oder b) wenn es die Institution ist, für die Sie tätig sind und Sie innerhalb Ihrer Institution direkt entscheidungsverantwortlich für die Verwendung der Zuwendung/Mittel sind. Sind Sie nicht direkt entscheidungsverantwortlich, sind keine Angaben nötig.

|                                                                         |  |  |  |  |  |  |
|-------------------------------------------------------------------------|--|--|--|--|--|--|
| Eigentümerinteressen (Patent, Urheberrecht, Aktienbesitz <sup>6</sup> ) |  |  |  |  |  |  |
|-------------------------------------------------------------------------|--|--|--|--|--|--|

---

<sup>6</sup> Betrifft nur Eigentümerinteressen im Gesundheitswesen; auch sind Angaben zu Mischfonds nicht erforderlich.

### 3. Indirekte Interessen

Hier werden persönliche Beziehungen zu Interessenverbänden im Gesundheitswesen, „intellektuelle“, akademische, und wissenschaftliche Interessen oder Standpunkte sowie Schwerpunkte klinischer Tätigkeiten/Einkommensquellen erfasst (für den Zeitraum des laufenden Jahres oder der 3 Kalenderjahre davor). Hierunter fallen auch solche, die indirekt mit finanziellen persönlichen Interessen verbunden sein können.

- Sind oder waren Sie in Wissenschaftlichen Fachgesellschaften, Berufsverbänden, Institutionen der Selbstverwaltung, Patientenselbsthilfegruppen, Verbrauchervertretungen oder anderen Verbänden aktiv? Wenn ja, in welcher Funktion (z.B. Mandatsträger für diese/andere Leitlinien, Vorstand)?
- Können Sie Schwerpunkte Ihrer wissenschaftlichen und /oder klinischen Tätigkeiten benennen? Fühlen Sie sich bestimmten „Schulen“ zugehörig?
- Waren Sie an der inhaltlichen Gestaltung von Fortbildungen federführend beteiligt?
- Haben Sie persönliche Beziehungen (als Partner oder Verwandter 1. Grades) zu einem Vertretungsberechtigten eines Unternehmens der Gesundheitswirtschaft?

Machen Sie bitte in folgender Tabelle zu allen zutreffenden Aspekten konkrete Angaben.

| Art der Beziehung/Tätigkeit                                                                                                                   | Namen / Schwerpunkte (bitte konkret benennen)                                                              | Zeitraum der Beziehung/Tätigkeit <sup>7</sup> | Themenbezug zur Leitlinie <sup>8</sup> |
|-----------------------------------------------------------------------------------------------------------------------------------------------|------------------------------------------------------------------------------------------------------------|-----------------------------------------------|----------------------------------------|
| Mitgliedschaft /Funktion in Interessenverbänden                                                                                               | Mitgliedschaft International Society of Pharmacovigilance (IsoP), Deutsche Gesellschaft für Innere Medizin | ca. 10 Jahre                                  | nein                                   |
| Schwerpunkte wissenschaftlicher Tätigkeiten, Publikationen                                                                                    |                                                                                                            |                                               |                                        |
| Schwerpunkte klinischer Tätigkeiten                                                                                                           |                                                                                                            |                                               |                                        |
| Federführende Beteiligung an Fortbildungen/Ausbildungsinstituten                                                                              |                                                                                                            |                                               |                                        |
| Persönliche Beziehungen (als Partner oder Verwandter 1. Grades) zu einem Vertretungsberechtigten eines Unternehmens der Gesundheitswirtschaft |                                                                                                            |                                               |                                        |

<sup>7</sup> Innerhalb des Erfassungszeitraums, d.h. im gegenwärtigen und den zurückliegenden 3 Jahren, Angabe: von (Monat/Jahr) bis (Monat/Jahr)

<sup>8</sup> Angabe einer Selbsteinschätzung „Nein“ oder „Ja“

#### 4. Sonstige Interessen

|                                                                                                                                                           |
|-----------------------------------------------------------------------------------------------------------------------------------------------------------|
| Sehen Sie andere Aspekte oder Umstände, die von Dritten als einschränkend in Bezug auf Ihre Objektivität oder Unabhängigkeit wahrgenommen werden könnten? |
| Nein                                                                                                                                                      |

Ich erkläre hiermit nach bestem Wissen und Gewissen, dass ich alle mir derzeit bekannten Umstände aufgeführt habe, die gegebenenfalls zu einem persönlichen Interessenkonflikt bei der themenbezogenen Mitwirkung bei der Erstellung der Leitlinie führen können. Ich erkläre weiterhin, dass ich die Diskussion der Erklärungen anderer Mitglieder in der Leitliniengruppe absolut vertraulich behandeln werde. Ich bin darüber informiert, dass die Angaben in standardisierter Zusammenfassung mit der Leitlinie/in einem begleitenden Leitlinienreport veröffentlicht werden, und dass das vorliegende Formular vor der Einsicht unberechtigter Dritter geschützt aufbewahrt wird. Hiermit bin ich einverstanden.

9.6.2020

\_\_\_\_\_  
Datum

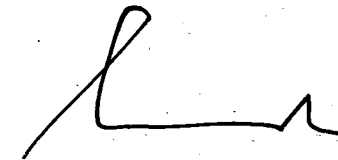

\_\_\_\_\_  
Unterschrift

#### Ergänzende Hinweise

- Bitte füllen Sie das Formular vollständig aus.
- Falls Sie zu bestimmten Fragen keine Angaben machen können oder wollen, begründen Sie dies bitte.
- Bitte speichern Sie das ausgefüllte Formular und senden es an [ulrike.stamer@dbmr.unibe.ch](mailto:ulrike.stamer@dbmr.unibe.ch)

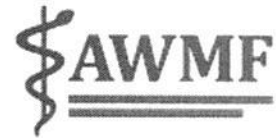

## Erklärung von Interessen

(Titel, AWMF-Registernummer)

zu Händen

(Leitlinienkoordinator)

### Vorbemerkung

Alle Mitglieder der Leitliniengruppe sind gehalten, die nachstehende Erklärung von Interessen auszufüllen. Die Erklärung wird gegenüber dem Leitlinienkoordinator abgegeben. Dies soll bereits zu Beginn des Leitlinienprojekts erfolgen bzw. zu dem Zeitpunkt, an dem die Mitglieder ihre Teilnahme am Leitlinienprojekt gegenüber dem Koordinator bestätigen. Bei länger andauernden Projekten ist eine Erneuerung der Erklärung einmal pro Jahr bis zum Abschluss der Leitlinienentwicklung, zumindest aber vor der Konsensfindung, erforderlich.

In der Erklärung sind alle Interessen aufzuführen, unabhängig davon, ob der/die Erklärende selbst darin einen thematischen Bezug zur Leitlinie oder einen Interessenskonflikt sieht oder nicht. Ob Interessenkonflikte bestehen und ob dadurch die erforderliche Neutralität für die Mitarbeit bei der Leitlinienentwicklung in Frage gestellt ist oder in welchen speziellen Bereichen /Fragestellungen der Leitlinie das professionelle Urteilsvermögen eines Experten durch sekundäre Interessen beeinflusst sein könnte, ist durch einen Dritten zu bewerten und in der Leitliniengruppe zu diskutieren. Die Erklärung betrifft Interessen innerhalb **des laufenden Jahres sowie der zurückliegenden 3 Jahre**.

Die Originale der Erklärungen verbleiben vertraulich beim Leitlinienkoordinator. Die Inhalte der Erklärungen sind in der Langfassung der Leitlinie bzw. im Leitlinienreport in standardisierter Zusammenfassung offen darzulegen. Ergänzend sind das Verfahren der Sammlung und Bewertung der Erklärungen sowie die Ergebnisse der Diskussion zum Umgang mit Interessenkonflikten darzulegen.

#### Informationen zur Datenerhebung gemäß Artikel 13 DSGVO

Der Leitlinienkoordinator erhebt Ihre Daten zum Zweck des o.g. Leitlinienvorhabens sowie zur Erfüllung des Regelwerkes der AWMF. Die Datenerhebung und Datenverarbeitung sind für die Durchführung des Leitlinienvorhabens erforderlich und beruhen auf Artikel 6 Abs. 1 b) DSGVO. Eine Weitergabe der Daten an Dritte findet nur zum Zweck der Erfüllung des Regelwerkes der AWMF statt. Die Daten werden gelöscht, sobald sie für den Zweck ihrer Verarbeitung nicht mehr erforderlich sind. Sie sind berechtigt, Auskunft der im Rahmen des Leitlinienvorhabens über Sie gespeicherten Daten zu beantragen sowie bei Unrichtigkeit der Daten die Berichtigung oder bei unzulässiger Datenspeicherung die Löschung der Daten zu fordern.



## Erklärung

### 1. Allgemeine Angaben

|                                               |                                                                                                                       |                                                                                      |
|-----------------------------------------------|-----------------------------------------------------------------------------------------------------------------------|--------------------------------------------------------------------------------------|
| Name, Vorname, Titel                          | Stichtenoth, Dirk O., Prof. Dr. med.                                                                                  |                                                                                      |
| Arbeitgeber / Institution                     | Gegenwärtig<br>Land Niedersachsen, Medizinische Hochschule Hannover (MHH)                                             | Früher(e) innerhalb des laufenden Jahres oder der 3 Kalenderjahre davor:<br>s. links |
| Position / Funktion in der Institution        | Direktor, Institut für Klinische Pharmakologie der MHH                                                                | s. links                                                                             |
| Adresse                                       | Carl-Neuberg-Str. 1, 30625 Hannover                                                                                   |                                                                                      |
| e-mail-Adresse                                | Stichtenoth.Dirk@MH-Hannover.de                                                                                       |                                                                                      |
| Bei Rückfragen telefonisch zu erreichen unter | Tel: 0511 532-2820, <a href="https://www.mh-hannover.de/klinpharm.html">https://www.mh-hannover.de/klinpharm.html</a> |                                                                                      |
| Funktion in der Leitliniengruppe              | Autor mit Expertise für klinische Pharmakologie                                                                       |                                                                                      |
| Datum                                         | 03.03.2020                                                                                                            |                                                                                      |
| Zeitraum, auf den sich die Erklärung bezieht  | 2017-2020                                                                                                             |                                                                                      |

## 2. Direkte, finanzielle Interessen

Hier werden finanzielle Beziehungen zu Unternehmen, Institutionen oder Interessenverbänden im Gesundheitswesen erfasst. Haben Sie oder die Einrichtung, für die Sie tätig sind, innerhalb des laufenden Jahres oder der 3 Kalenderjahre davor Zuwendungen erhalten von Unternehmen der Gesundheitswirtschaft (z.B. Arzneimittelindustrie, Medizinproduktindustrie), industriellen Interessenverbänden, kommerziell orientierten Auftragsinstituten, Versicherungen/Versicherungsträgern, oder von öffentlichen Geldgebern (z.B. Ministerien), Körperschaften/Einrichtungen der Selbstverwaltung, Stiftungen, oder anderen Geldgebern? Machen Sie bitte in folgender Tabelle zu allen zutreffenden Aspekten konkrete Angaben.

| Art der Beziehung/Tätigkeit                                   | Name des/der Kooperationspartner/s                 | Zeitraum der Beziehung/Tätigkeit <sup>1</sup>                                                            | Thema, Bezug zur Leitlinie <sup>2</sup>                       | Art der Zuwendung <sup>3</sup> | Höhe der Zuwendung <sup>4</sup> | Empfänger <sup>5</sup> |
|---------------------------------------------------------------|----------------------------------------------------|----------------------------------------------------------------------------------------------------------|---------------------------------------------------------------|--------------------------------|---------------------------------|------------------------|
| Berater-/Gutachtertätigkeit                                   | nein                                               | -                                                                                                        | -                                                             | -                              | -                               | -                      |
| Mitarbeit in einem wissenschaftlichen Beirat (advisory board) | nein                                               | -                                                                                                        | -                                                             | -                              | -                               | -                      |
| Vortrags-/oder Schulungstätigkeit                             | Rheumatologische Fortbildungsakademie GmbH, Berlin | Januar/2017 bis März/2020<br>Vorträge im Curriculum „Management rheumatologischer Erkrankungen im Alter“ | Klinische Pharmakologie bei älteren Rheumapatienten<br><br>ja | Honorar, Reisekosten           | Insgesamt 1795,26 Euro          | a)                     |

<sup>1</sup> Innerhalb des Erfassungszeitraums, d.h. im gegenwärtigen und den zurückliegenden 3 Jahren, Angabe: von (Monat/Jahr) bis (Monat/Jahr)

<sup>2</sup> Angabe des Themas, bei Präparaten/Geräten auch Handelsname bzw. Wirkstoffname (Freitext), zusätzlich Angabe einer Selbsteinschätzung des Bezugs zur Leitlinie: „Nein“ oder „Ja“

<sup>3</sup> Honorar, Drittmittel, geldwerte Vorteile (z.B. Personal-oder Sachmittel; Reisekosten, Teilnahmegebühren, Bewirtung i.R. von Veranstaltungen), Verkaufslizenz

<sup>4</sup> Es können gerundete Beträge angegeben werden (z.B. bei Beiträgen > 1000 € jeweils auf die nächste Tausenderstelle): Die Angaben beziehen sich auf die Gesamtsumme der Zuwendungen für eine angegebene Tätigkeit über den Erfassungszeitraum, Angabe: von (Monat/Jahr) bis (Monat/Jahr).

Diese Angaben werden vertraulich behandelt.

<sup>5</sup> Bitte angeben: a) wenn Sie persönlich Empfänger der Zuwendung sind oder b) wenn es die Institution ist, für die Sie tätig sind und Sie innerhalb Ihrer Institution direkt entscheidungsverantwortlich für die Verwendung der Zuwendung/Mittel sind. Sind Sie nicht direkt entscheidungsverantwortlich, sind keine Angaben nötig.

AWMF-Formular zur Erklärung von Interessen im Rahmen von Leitlinienvorhaben

|                                                                            |                                                                                                 |                                                                                                                                   |                                                                                                                      |                         |              |    |
|----------------------------------------------------------------------------|-------------------------------------------------------------------------------------------------|-----------------------------------------------------------------------------------------------------------------------------------|----------------------------------------------------------------------------------------------------------------------|-------------------------|--------------|----|
|                                                                            | DIAPLAN GmbH,<br>Overath                                                                        | September/2017<br>Vortrag auf<br>Internisten-Tag<br>Niedersachsen                                                                 | Nierenfunktion und<br>Medikamente: was ist<br>zu beachten?<br>ja                                                     | Honorar,<br>Reisekosten | 368,78 Euro  | a) |
|                                                                            | Landesvereinigung<br>für Gesundheit und<br>Akademie für<br>Sozialmedizin<br>Niedersachsen e. V. | Februar/2018<br>Vortrag auf<br>Fortbildungsveranst<br>altung „Vermeidung<br>von Polymedikation<br>bei koronarer<br>Herzkrankheit“ | Polymedikation<br>nein                                                                                               | Honorar,<br>Reisekosten | 333,2 Euro   | a) |
|                                                                            | Krankenhaus St.<br>Joseph-Stift GmbH,<br>Bremen                                                 | Oktober/2018<br>Vortrag auf „3.<br>Bremer Geriatrie-<br>Symposium“                                                                | Pharmakologie im<br>Alter<br>ja                                                                                      | Honorar,<br>Reisekosten | 1052,95 Euro | a) |
| Autoren-/oder Coautorenschaft                                              | Georg Thieme<br>Verlag KG,<br>Stuttgart                                                         | Januar 2017/März<br>2017<br>Kapitel im Buch<br>„Schmerzmedizin –<br>1000 Fragen“                                                  | Nichtopioid,<br>Koanalgetika,<br>Adjuvante Therapien,<br>Wechselwirkungen,<br>Schwangerschaft und<br>Stillzeit<br>ja | Honorar                 | 110 Euro     | a) |
|                                                                            | Deutsche Rheuma-<br>Liga<br>Bundesverband e.<br>V., Bonn                                        | April/2017<br>Beitrag Zeitschrift<br>mobil 4/2017                                                                                 | Methotrexat und<br>Konsum<br>koffeinhaltiger<br>Getränke<br>nein                                                     | Honorar                 | 26 Euro      | a) |
| Forschungsvorhaben/<br>Durchführung klinischer Studien                     | nein                                                                                            | -                                                                                                                                 | -                                                                                                                    | -                       | -            | -  |
| Eigentümerinteressen (Patent,<br>Urheberrecht, Aktienbesitz <sup>6</sup> ) | nein                                                                                            | -                                                                                                                                 | -                                                                                                                    | -                       | -            | -  |

<sup>6</sup> Betrifft nur Eigentümerinteressen im Gesundheitswesen; auch sind Angaben zu Mischfonds nicht erforderlich.  
AWMF-Formular zur Erklärung von Interessen im Rahmen von Leitlinienvorhaben  
Stand 23.05.2018

### 3. Indirekte Interessen

Hier werden persönliche Beziehungen zu Interessenverbänden im Gesundheitswesen, „intellektuelle“, akademische, und wissenschaftliche Interessen oder Standpunkte sowie Schwerpunkte klinischer Tätigkeiten/Einkommensquellen erfasst (für den Zeitraum des laufenden Jahres oder der 3 Kalenderjahre davor). Hierunter fallen auch solche, die indirekt mit finanziellen persönlichen Interessen verbunden sein können.

- Sind oder waren Sie in Wissenschaftlichen Fachgesellschaften, Berufsverbänden, Institutionen der Selbstverwaltung, Patientenselbsthilfegruppen, Verbraucherververtretungen oder anderen Verbänden aktiv? Wenn ja, in welcher Funktion (z.B. Mandatsträger für diese/andere Leitlinien, Vorstand)?
- Können Sie Schwerpunkte Ihrer wissenschaftlichen und /oder klinischen Tätigkeiten benennen? Fühlen Sie sich bestimmten „Schulen“ zugehörig?
- Waren Sie an der inhaltlichen Gestaltung von Fortbildungen federführend beteiligt?
- Haben Sie persönliche Beziehungen (als Partner oder Verwandter 1. Grades) zu einem Vertretungsberechtigten eines Unternehmens der Gesundheitswirtschaft?

Machen Sie bitte in folgender Tabelle zu allen zutreffenden Aspekten konkrete Angaben.

| Art der Beziehung/Tätigkeit                                   | Namen / Schwerpunkte (bitte konkret benennen)                                                                                                                                                                                                                                                                                                                                                                                                                                        | Zeitraum der Beziehung/<br>Tätigkeit <sup>7</sup>                                                     | Themenbezug<br>zur Leitlinie <sup>8</sup> |
|---------------------------------------------------------------|--------------------------------------------------------------------------------------------------------------------------------------------------------------------------------------------------------------------------------------------------------------------------------------------------------------------------------------------------------------------------------------------------------------------------------------------------------------------------------------|-------------------------------------------------------------------------------------------------------|-------------------------------------------|
| Mitgliedschaft /Funktion in<br>Interessenverbänden            | Deutsche Gesellschaft für experimentelle und klinische Pharmakologie und Toxikologie e.V. (DGPT) / Mitglied<br>Deutschen Gesellschaft für Klinische Pharmakologie und Therapie (DGKlIPha) / Mitglied<br>Deutsche Gesellschaft für Rheumatologie (DGRh) / Mitglied, Beteiligung an Leitlinienerstellung<br>Deutscher Hochschulverband (DHV) / Mitglied<br>Ärztetkammer Niedersachsen / Mitglied, Stellvertretender Vorsitzender der Ethikkommission bei der Ärztekammer Niedersachsen | 1/2017 bis 3/2020<br>1/2017 bis 3/2020<br>1/2017 bis 3/2020<br>1/2017 bis 3/2020<br>1/2017 bis 3/2020 | ja<br>ja<br>ja<br>nein<br>nein            |
| Schwerpunkte wissenschaftlicher<br>Tätigkeiten, Publikationen | Arzneimitteltherapiesicherheit, Klinische Pharmakologie des Prostanoidstoffwechsels, Stickstoffmonoxid-Stoffwechsel bei Entzündungen und dessen pharmakologische Beeinflussbarkeit.                                                                                                                                                                                                                                                                                                  | 1/2017 bis 3/2020                                                                                     | ja                                        |
| Schwerpunkte klinischer Tätigkeiten                           | Fachärztlicher klinisch-pharmakologischer Konsiliardienst, Arzneimittelbeauftragter der MHH und Vorsitz der Arzneimittelkommission. Leitung des Zentrums für Arzneimittelsicherheit.                                                                                                                                                                                                                                                                                                 | 1/2017 bis 3/2020                                                                                     | ja                                        |

<sup>7</sup> Innerhalb des Erfassungszeitraums, d.h. im gegenwärtigen und den zurückliegenden 3 Jahren, Angabe: von (Monat/Jahr) bis (Monat/Jahr)

<sup>8</sup> Angabe einer Selbsteinschätzung „Nein“ oder „Ja“

|                                                                                                                                               |                                                                                                                                                                                                                                                                                                                          |                                                             |                  |
|-----------------------------------------------------------------------------------------------------------------------------------------------|--------------------------------------------------------------------------------------------------------------------------------------------------------------------------------------------------------------------------------------------------------------------------------------------------------------------------|-------------------------------------------------------------|------------------|
| Federführende Beteiligung an Fortbildungen/Ausbildungsinstituten                                                                              | Fortbildungsveranstaltung Pharmakotherapeutische Besprechung, Institut für Klinische Pharmakologie der MHH<br>Fortbildungsveranstaltung Journal Club: Vorstellung und Diskussion aktueller Publikationen, Institut für Klinische Pharmakologie der MHH<br>Modulares Fortbildungsprogramm für klinische Prüfungen der MHH | 1/2017 bis 3/2020<br>1/2017 bis 3/2020<br>1/2017 bis 2/2018 | ja<br>ja<br>nein |
| Persönliche Beziehungen (als Partner oder Verwandter 1. Grades) zu einem Vertretungsberechtigten eines Unternehmens der Gesundheitswirtschaft | nein                                                                                                                                                                                                                                                                                                                     | -                                                           | -                |

#### 4. Sonstige Interessen

Sehen Sie andere Aspekte oder Umstände, die von Dritten als einschränkend in Bezug auf Ihre Objektivität oder Unabhängigkeit wahrgenommen werden könnten?

Nein

Ich erkläre hiermit nach bestem Wissen und Gewissen, dass ich alle mir derzeit bekannten Umstände aufgeführt habe, die gegebenenfalls zu einem persönlichen Interessenkonflikt bei der themenbezogenen Mitwirkung bei der Erstellung der Leitlinie führen können. Ich erkläre weiterhin, dass ich die Diskussion der Erklärungen anderer Mitglieder in der Leitliniengruppe absolut vertraulich behandeln werde. Ich bin darüber informiert, dass die Angaben in standardisierter Zusammenfassung mit der Leitlinie/in einem begleitenden Leitlinienreport veröffentlicht werden, und dass das vorliegende Formular vor der Einsicht unberechtigter Dritter geschützt aufbewahrt wird. Hiermit bin ich einverstanden.

Hannover, 6. März 2020

Datum



Unterschrift

#### Ergänzende Hinweise

- Bitte füllen Sie das Formular vollständig aus.
- Falls Sie zu bestimmten Fragen keine Angaben machen können oder wollen, begründen Sie dies bitte.
- Bitte speichern Sie das ausgefüllte Formular und senden es an das Leitliniensekretariat: [xxx@yyy.zz](mailto:xxx@yyy.zz)

## Erklärung

### 1. Allgemeine Angaben

|                                               |                                                               |                                                                                                    |
|-----------------------------------------------|---------------------------------------------------------------|----------------------------------------------------------------------------------------------------|
| Name, Vorname, Titel                          | <u>Priv.-Doz. Dr. Stefan Wirz</u>                             |                                                                                                    |
| Arbeitgeber / Institution                     | <u>Gegenwärtig</u><br><u>GFO-Kliniken Bonn</u>                | <u>Früher(e) innerhalb des laufenden</u><br><u>Jahres oder der 3 Kalenderjahre</u><br><u>davor</u> |
| Position / Funktion in der Institution        | <u>Chefarzt</u>                                               |                                                                                                    |
| Adresse                                       | <u>Schülgenstr. 15, 5304 Bad Honnef</u>                       |                                                                                                    |
| e-mail-Adresse                                | <u>anaesthesie@cura.org; stefan.wirz@gfo-kliniken-bonn.de</u> |                                                                                                    |
| Bei Rückfragen telefonisch zu erreichen unter | <u>02224 772 -1194, -1269, -1285</u>                          |                                                                                                    |
| Funktion in der Leitliniengruppe              | <u>Experte, Mitglied der Deutschen Schmerzgesellschaft</u>    |                                                                                                    |
| Datum                                         | <u>24.2.2020</u>                                              |                                                                                                    |
| Zeitraum, auf den sich die Erklärung bezieht  | <u>Ab 2017</u>                                                |                                                                                                    |

## 2. Direkte, finanzielle Interessen

Hier werden finanzielle Beziehungen zu Unternehmen, Institutionen oder Interessenverbänden im Gesundheitswesen erfasst. Haben Sie oder die Einrichtung, für die Sie tätig sind, innerhalb des laufenden Jahres oder der 3 Kalenderjahre davor Zuwendungen erhalten von Unternehmen der Gesundheitswirtschaft (z.B. Arzneimittelindustrie, Medizinproduktindustrie), industriellen Interessenverbänden, kommerziell orientierten Auftragsinstituten, Versicherungen/Versicherungsträgern, oder von öffentlichen Geldgebern (z.B. Ministerien), Körperschaften/Einrichtungen der Selbstverwaltung, Stiftungen, oder anderen Geldgebern? Machen Sie bitte in folgender Tabelle zu allen zutreffenden Aspekten konkrete Angaben.

| Art der Beziehung/Tätigkeit                                   | Name des/der Kooperationspartners | Zeitraum der Beziehung/Tätigkeit <sup>1</sup> | Thema, Bezug zur Leitlinie <sup>2</sup> | Art der Zuwendung <sup>3</sup> | Höhe der Zuwendung <sup>4</sup> | Empfänger <sup>5</sup> |
|---------------------------------------------------------------|-----------------------------------|-----------------------------------------------|-----------------------------------------|--------------------------------|---------------------------------|------------------------|
| Berater-/Gutachtentätigkeit                                   | nein                              |                                               |                                         |                                |                                 |                        |
| Mitarbeit in einem Wissenschaftlichen Beirat (advisory board) | Kyowa Kirin                       |                                               | Kein                                    | Honorar                        |                                 |                        |
|                                                               | Sandoz/Hexal<br>Mundipharma       |                                               |                                         |                                |                                 |                        |
| Vortrags-/oder Schulungstätigkeit                             | Kyowa Kirin                       |                                               | Kein                                    | Honorar                        |                                 |                        |
|                                                               | Sandoz/Hexal<br>Grünenthal        |                                               |                                         |                                |                                 |                        |
| Autoren-/oder Coautorenschaft                                 | nein                              |                                               |                                         |                                |                                 |                        |
| Forschungsvorhaben/<br>Durchführung klinischer Studien        | nein                              |                                               |                                         |                                |                                 |                        |

Formatiert: Einzug: Hängend: 0,45 cm

- <sup>1</sup> Innerhalb des Erfassungszeitraums, d.h. im gegenwärtigen und den zurückliegenden 3 Jahren, Angabe: von (Monat/Jahr) bis (Monat/Jahr)
- <sup>2</sup> Angabe des Themas, bei Präparaten/Geräten auch Handelsname bzw. Wirkstoffname (Freitext), zusätzlich Angabe einer Selbstschätzung des Bezugs zur Leitlinie: „Nein“ oder „Ja“
- <sup>3</sup> Honorar, Drittmittel, geldwerte Vorteile (z.B. Personal-oder Sachmittel, Reisekosten, Teilnahmegebühren, Bewirtung i.R. von Veranstaltungen), Verkaufslizenz
- <sup>4</sup> Es können gerundete Beträge angegeben werden (z.B. bei Beiträgen > 1000 € jeweils auf die nächste Tausenderstelle): Die Angaben beziehen sich auf die Gesamtsumme der Zuwendungen für eine angegebene Tätigkeit über den Erfassungszeitraum, Angabe: von (Monat/Jahr) bis (Monat/Jahr).
- <sup>5</sup> Bitte angeben: a) wenn Sie persönlich Empfänger der Zuwendung sind oder b) wenn es die Institution ist, für die Sie tätig sind und Sie innerhalb Ihrer Institution direkt entscheidungsverantwortlich für die Verwendung der Zuwendung/Mittel sind. Sind Sie nicht direkt entscheidungsverantwortlich, sind keine Angaben nötig.

AWMF-Formular zur Erklärung von Interessen im Rahmen von Leitlinienvorhaben

Stand 23.05.2018



|                                                                         |      |  |  |  |  |  |  |
|-------------------------------------------------------------------------|------|--|--|--|--|--|--|
| Eigentümerinteressen (Patent, Urheberrecht, Aktienbesitz <sup>6</sup> ) | nein |  |  |  |  |  |  |
|-------------------------------------------------------------------------|------|--|--|--|--|--|--|

<sup>6</sup> Betrifft nur Eigentümerinteressen im Gesundheitswesen; auch sind Angaben zu Mischfonds nicht erforderlich.

### 3. Indirekte Interessen

Hier werden persönliche Beziehungen zu Interessenverbänden im Gesundheitswesen, „intellektuelle“, akademische, und wissenschaftliche Interessen oder Standpunkte sowie Schwerpunkte klinischer Tätigkeiten/Einkommensquellen erfasst (für den Zeitraum des laufenden Jahres oder der 3 Kalenderjahre davor). Hierunter fallen auch solche, die indirekt mit finanziellen Interessen verbunden sein können.

- Sind oder waren Sie in wissenschaftlichen Fachgesellschaften, Berufsverbänden, Institutionen der Selbstverwaltung, Patientenselbsthilfegruppen, Vertretervertretungen oder anderen Verbänden aktiv? Wenn ja, in welcher Funktion (z.B. Mandatsträger für diese/andere Leitlinien, Vorstand)?
- Können Sie Schwerpunkte Ihrer wissenschaftlichen und/oder klinischen Tätigkeiten benennen? Fühlen Sie sich bestimmten „Schulen“ zugehörig?
- Waren Sie an der inhaltlichen Gestaltung von Fortbildungen federführend beteiligt?
- Haben Sie persönliche Beziehungen (als Partner oder Verwandter 1. Grades) zu einem Vertretungsberechtigten eines Unternehmens der Gesundheitswirtschaft?

Machen Sie bitte in folgender Tabelle zu allen zutreffenden Aspekten konkrete Angaben.

| Art der Beziehung/Tätigkeit                                                                                                                            | Namen / Schwerpunkte (bitte konkret benennen)                                                                                                                                            | Zeitraum der Beziehung/<br>Tätigkeit <sup>7</sup>                            | Themenbezug<br>zur Leitlinie <sup>8</sup> |
|--------------------------------------------------------------------------------------------------------------------------------------------------------|------------------------------------------------------------------------------------------------------------------------------------------------------------------------------------------|------------------------------------------------------------------------------|-------------------------------------------|
| Mitgliedschaft /Funktion in<br>Interessenverbänden                                                                                                     | <u>Deutsche Schmerzgesellschaft, Beirat, Sprcher Arbeitskreis Tumorschmerz, Mitglied Ad hoc Kommission Konvent der Schmerzambulanz; Mitglied Arbeitskreis Akutschmerz</u>                | <u>seit 2017</u><br><u>seit 2007</u><br><u>seit 2019</u><br><u>seit 2007</u> | <u>kein</u>                               |
| Schwerpunkte wissenschaftlicher<br>Tätigkeiten, Publikationen                                                                                          | <u>Opioidtypische Symptome, Tumorschmerz, Chronifizierung von Schmerzen, Gesichtsschmerz, peripherer Schmerz</u><br><u>Anästhesie, Schmerzmedizin, Intensivmedizin, Palliativmedizin</u> | <u>Seit 2000</u><br><u>Seit 1990</u>                                         | <u>Kein</u><br><u>Kein</u>                |
| Schwerpunkte klinischer Tätigkeiten                                                                                                                    |                                                                                                                                                                                          |                                                                              |                                           |
| Federführende Beteiligung an<br>Fortbildungen/Ausbildungsinstiuten                                                                                     | <u>Unikliniken Bonn</u><br><u>GFO-Symposien</u>                                                                                                                                          | <u>2000-2008</u><br><u>Seit 2008</u>                                         | <u>Kein</u>                               |
| Persönliche Beziehungen (als Partner<br>oder Verwandter 1. Grades) zu einem<br>Vertretungsberechtigten eines<br>Unternehmens der Gesundheitswirtschaft | <u>nein</u>                                                                                                                                                                              |                                                                              |                                           |

<sup>7</sup> Innerhalb des Erfassungszeitraums, d.h. im gegenwärtigen und den zurückliegenden 3 Jahren, Angabe: von (Monat/Jahr) bis (Monat/Jahr)

<sup>8</sup> Angabe einer Selbsteinschätzung „Nein“ oder „Ja“

#### 4. Sonstige Interessen

Sehen Sie andere Aspekte oder Umstände, die von Dritten als einschränkend in Bezug auf Ihre Objektivität oder Unabhängigkeit wahrgenommen werden könnten?

nein

Ich erkläre hiermit nach bestem Wissen und Gewissen, dass ich alle mir derzeit bekannten Umstände aufgeführt habe, die gegebenenfalls zu einem persönlichen Interessenkonflikt bei der themenbezogenen Mitwirkung bei der Erstellung der Leitlinie führen können. Ich erkläre weiterhin, dass ich die Diskussion der Erklärungen anderer Mitglieder in der Leitliniengruppe absolut vertraulich behandeln werde. Ich bin darüber informiert, dass die Angaben in standardisierter Zusammenfassung mit der Leitlinie/in einem begleitenden Leitlinienreport veröffentlicht werden, und dass das vorliegende Formular vor der Einsicht unberechtigter Dritter geschützt aufbewahrt wird. Hiermit bin ich einverstanden.

Datum

24.2.2020

Unterschrift



#### Ergänzende Hinweise

- Bitte füllen Sie das Formular vollständig aus.
- Falls Sie zu bestimmten Fragen keine Angaben machen können oder wollen, begründen Sie dies bitte.
- Bitte speichern Sie das ausgefüllte Formular und senden es an das Leitliniensekretariat: [xxx@yyv.zz](mailto:xxx@yyv.zz)
